# Supplementary material for: Estimating the impact of trained midwives and upgraded health facilities on institutional delivery rates in Nigeria using a quasi-experimental study design
Source: HighWire-hosted journal article supplement (doi:10.1136/bmjopen-2021-053792), 2022-05-01
Supplement: bmjopen-2021-053792supp001_data_supplement.pdf [file bmjopen-2021-053792supp001_data_supplement.pdf]

## Supplementary Materials

The Wald test of the common trend assumption between 2008 and 2012 was never rejected for our main outcomes: institutional delivery (P-value = 0.30) and attendance of at least four antenatal visits during delivery (P-value = 0.24). Figures 1 and 2 show the trends, with confidence intervals, for these two outcome variables in the intervention and comparison groups during the 4-year pre-programme period; they confirm that pre-programme trends are roughly parallel when accounting for sampling noise. The common trend test is, however, rejected for infant mortality (p-value=0.016) and skilled birth attendance (p-value=0.046), hence we refrain from reporting results for these outcomes.

Figure 1: More than four time of ANC visits during pregnancy (catchment area=2500m, buffer=100m)

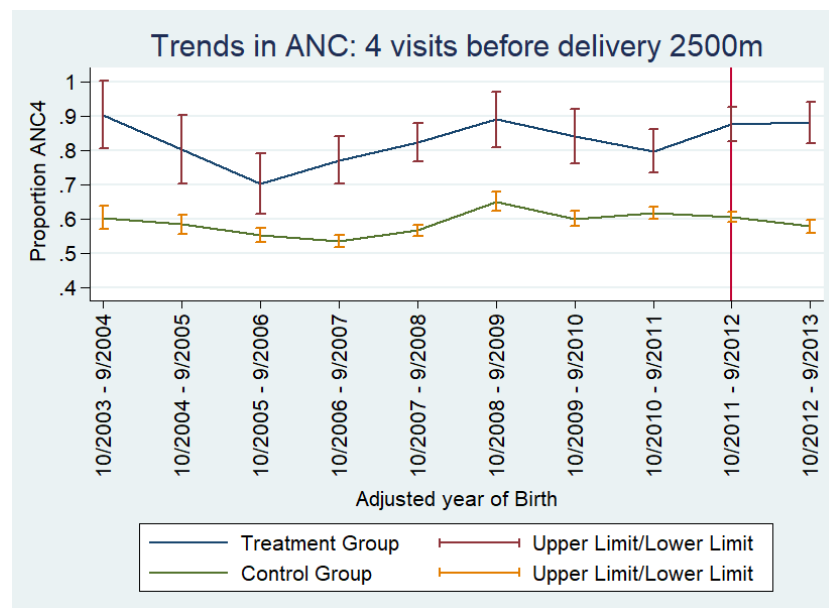

Figure 2: Skilled delivery (Catchment area=2500m, buffer=100m)

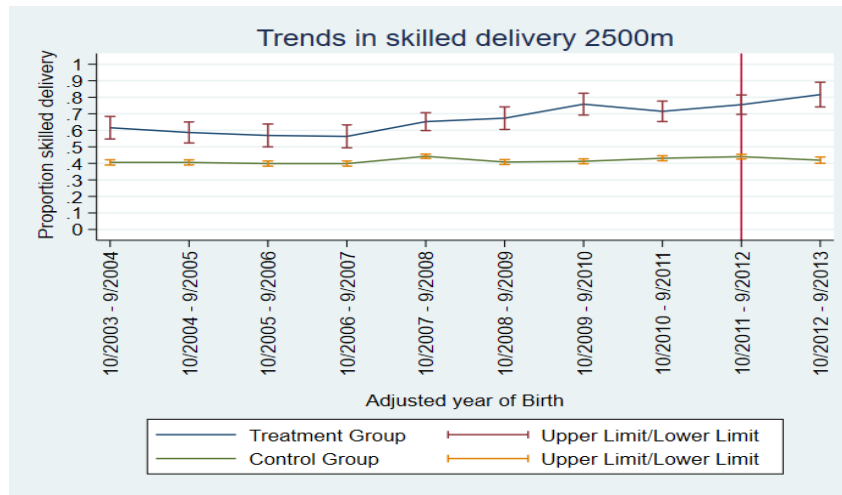

Figure 3: Institutional delivery (Catchment area=2500m, buffer=100m)

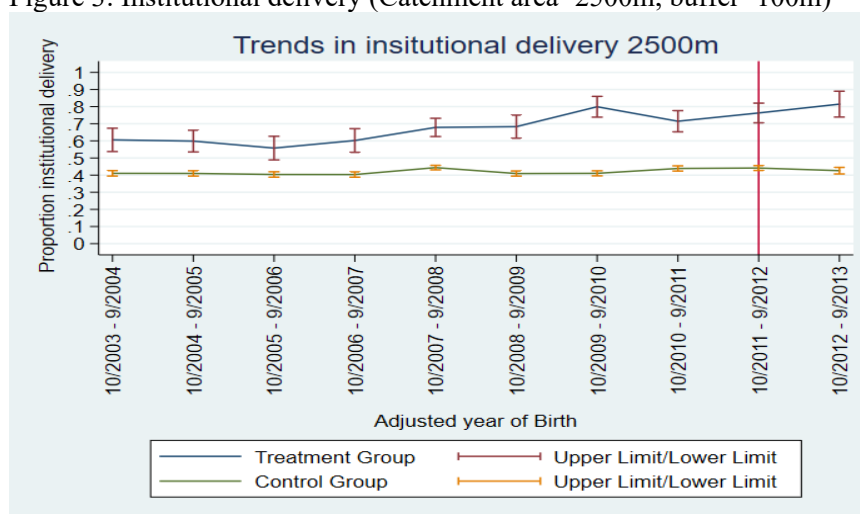

Table 1: Robustness check, estimates including data from the 2018 NDHS

| <b><i>First year of SURE-P MCH : Oct 2012 - Oct 2013 (with controls)</i></b>         |                 |                                |      |                |
|--------------------------------------------------------------------------------------|-----------------|--------------------------------|------|----------------|
|                                                                                      | <b>DID Coef</b> | <b>95% Confidence Interval</b> |      | <b>P-value</b> |
| <b><i>Institutional delivery</i></b>                                                 |                 |                                |      |                |
| 2000m                                                                                | <b>0.079</b>    | 0.00                           | 0.15 | <b>0.04</b>    |
| 2500m                                                                                | <b>0.068</b>    | 0.00                           | 0.14 | <b>0.06</b>    |
| 3000m                                                                                | <b>0.045</b>    | -0.01                          | 0.10 | <b>0.14</b>    |
| <b><i>At least 4 times of ANC visits</i></b>                                         |                 |                                |      |                |
| 2000m                                                                                | <b>0.031</b>    | -0.03                          | 0.10 | <b>0.35</b>    |
| 2500m                                                                                | <b>0.032</b>    | -0.02                          | 0.09 | <b>0.26</b>    |
| 3000m                                                                                | <b>0.002</b>    | -0.06                          | 0.06 | <b>0.95</b>    |
| <br>                                                                                 |                 |                                |      |                |
| <b><i>Second (final) year of SURE-P MCH: Oct 2013 - Oct 2014 (with controls)</i></b> |                 |                                |      |                |
|                                                                                      | <b>DID Coef</b> | <b>95% Confidence Interval</b> |      | <b>P-value</b> |
| <b><i>Institutional delivery</i></b>                                                 |                 |                                |      |                |
| 2000m                                                                                | <b>-0.015</b>   | -0.14                          | 0.02 | <b>0.16</b>    |
| 2500m                                                                                | <b>0.019</b>    | -0.10                          | 0.07 | <b>0.67</b>    |
| 3000m                                                                                | <b>-0.015</b>   | -0.09                          | 0.06 | <b>0.68</b>    |
| <b><i>At least 4 times of ANC visits</i></b>                                         |                 |                                |      |                |
| 2000m                                                                                | <b>-0.078</b>   | -0.19                          | 0.04 | <b>0.18</b>    |
| 2500m                                                                                | <b>0.052</b>    | -0.15                          | 0.04 | <b>0.29</b>    |
| 3000m                                                                                | <b>-0.049</b>   | -0.13                          | 0.04 | <b>0.26</b>    |
